# Supplementary material for: A novel fluorescent functional monomer as the recognition element in core–shell imprinted sensors responding to concentration of 2,4,6-trichlorophenol
Source: Royal Society of Chemistry journal article supplement (doi:10.1039/c7ra07742d), 2018-01-01
Supplement: c7ra07742d1.pdf [file c7ra07742d1.pdf]

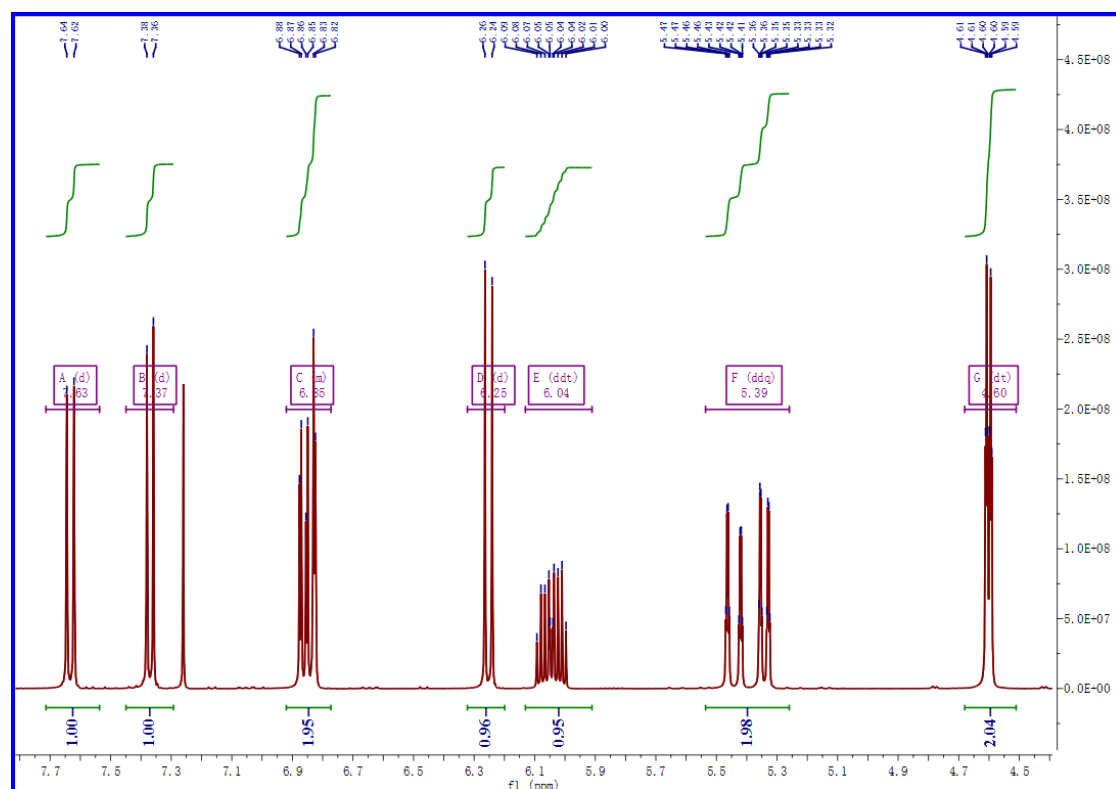

Figure S1.  $^1\text{H}$ NMR of 7-allyloxy coumarin

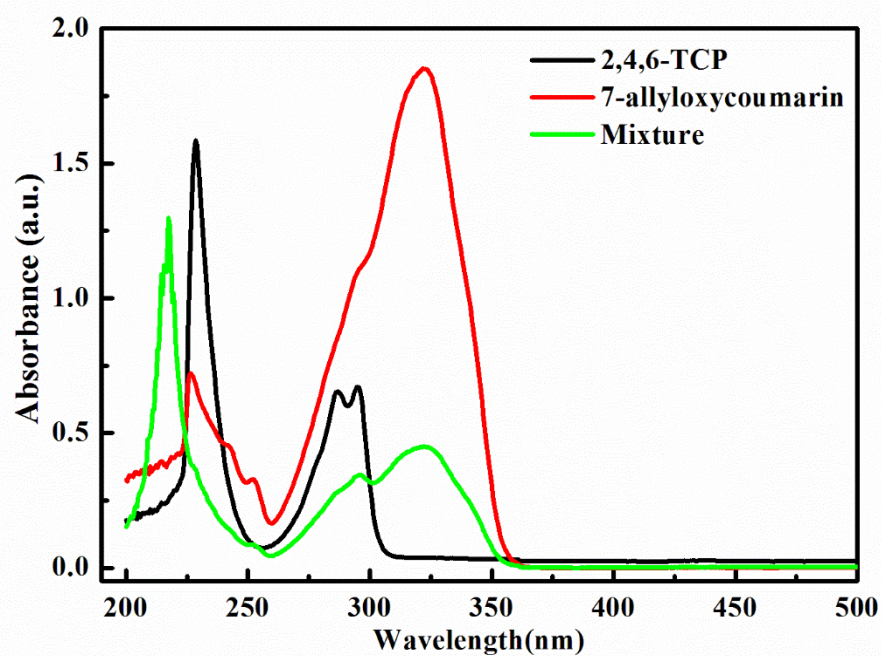

Figure S2. The absorption spectra of 2,4,6-TCP, 7-allyloxy coumarin and mixture solution in dichloromethane (a mixture of 2,4,6-TCP and 7-allyloxy coumarin in a molar ratio of 1:1).

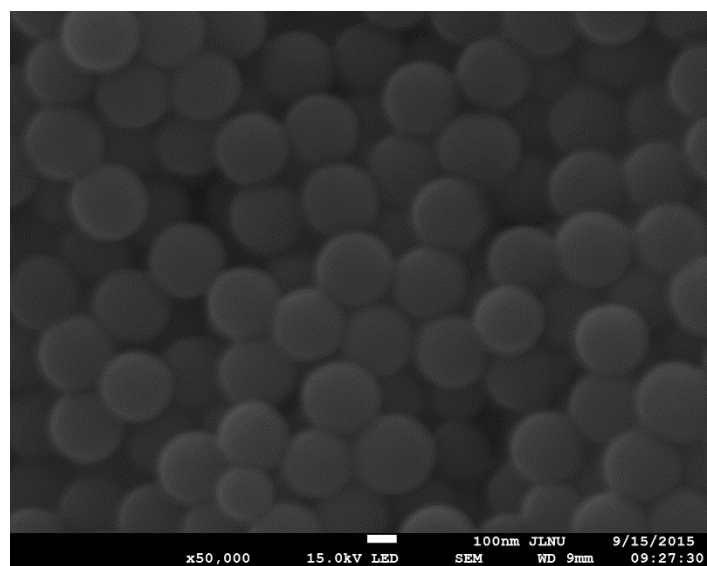

Figure S3. SEM of SiO<sub>2</sub> modified by MPS

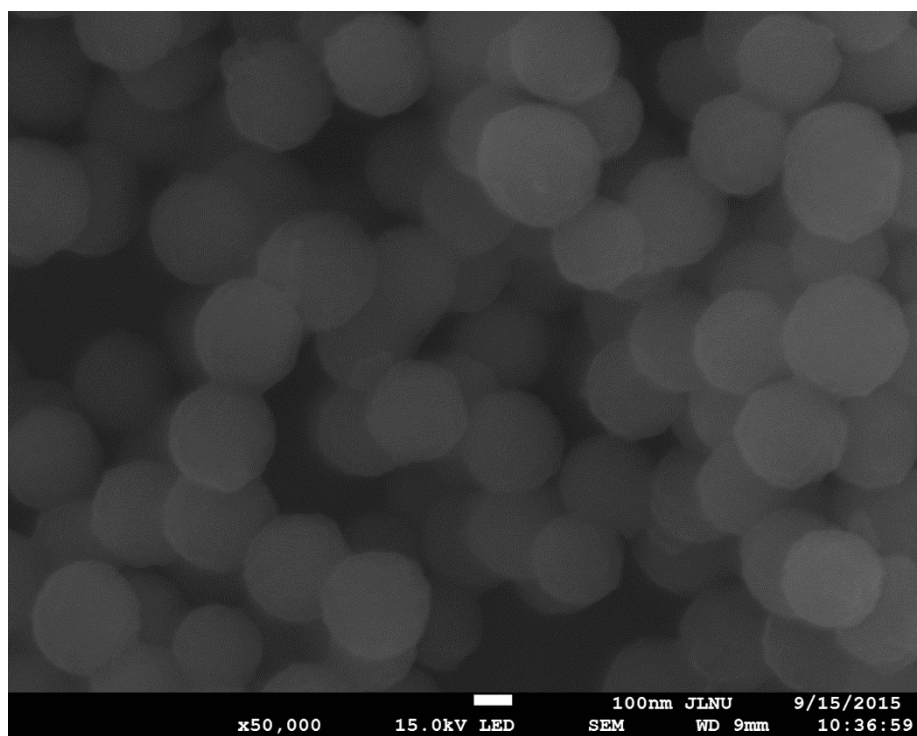

Figure S4. SEM of SiO<sub>2</sub>@dye-FMIPs sensors

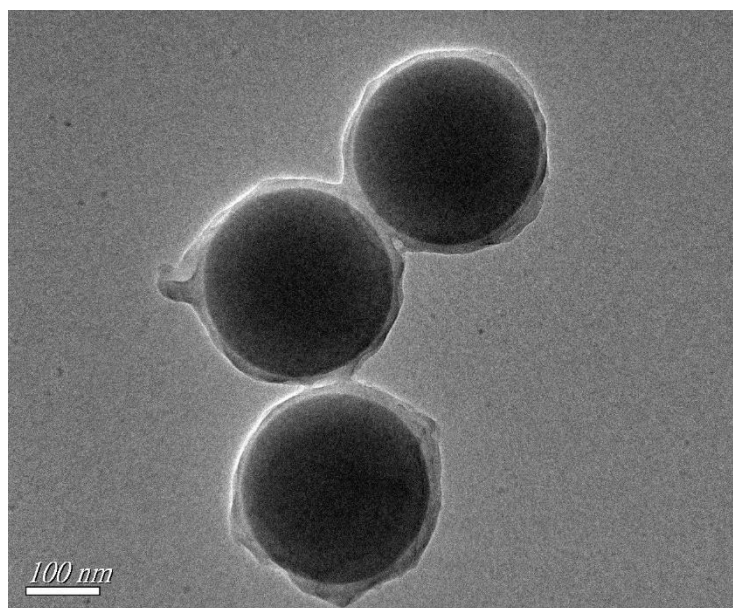

Figure S5. TEM of SiO<sub>2</sub>@dye-FMIPs sensors

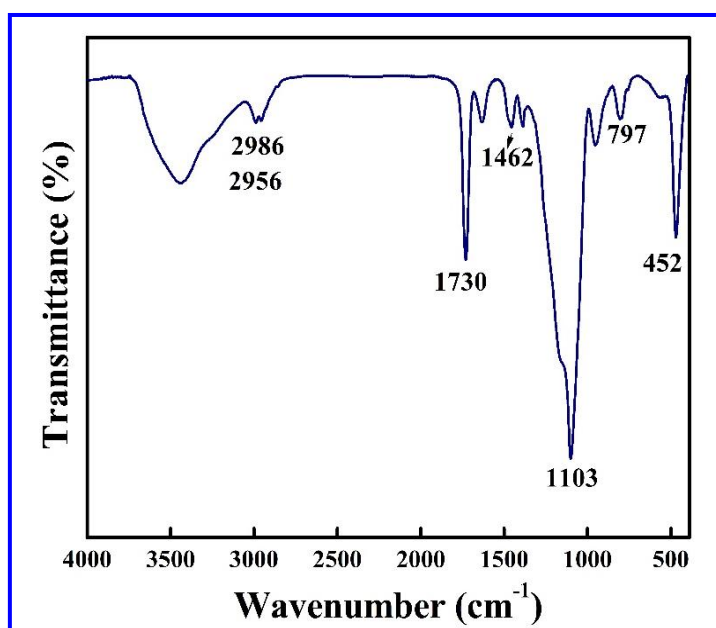

Figure S6. FT-IR spectra of SiO<sub>2</sub>@dye-FMIPs
